# Supplementary material
Source: PubMed Central journal article supplement (PMC3316485)
Supplement: NIHMS361806-supplement-Supplementary_Data.pdf [file NIHMS361806-supplement-Supplementary_Data.pdf]

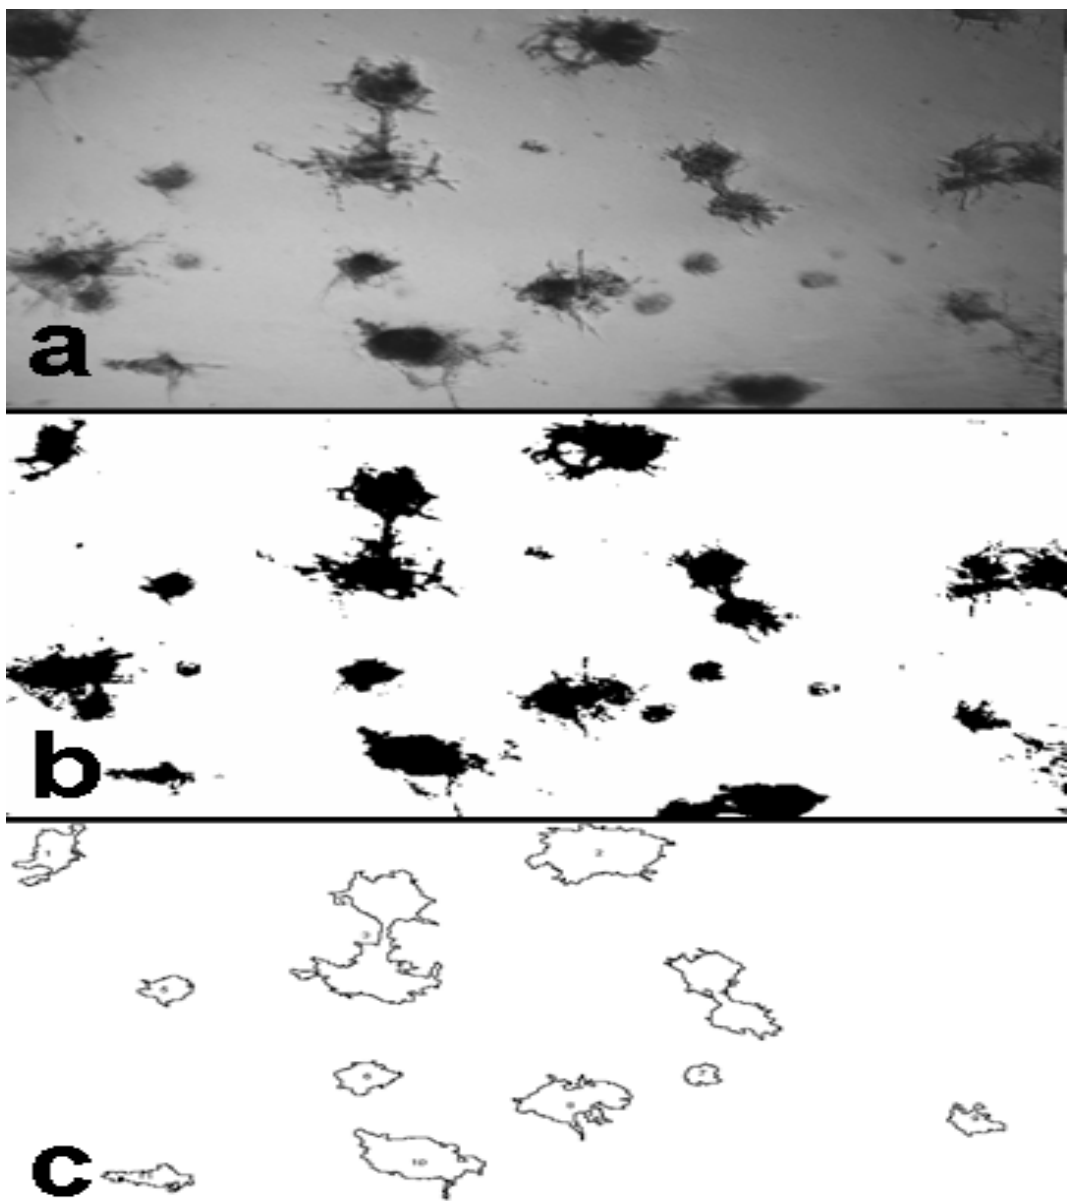

**Figure S1** | Quantification of spheroid size. (a) A random low power 40 X field of control spheroids (0  $\mu\text{g}$  exosomes) grown on matrigel for 13 days in 48 well culture plates was selected with phase contrast microscopy and image recorded using a Basler A320fc camera. (b) ImageJ analysis was performed to convert the image to 8bit, subtract background at 50 pixel rolling ball to light background and convert the image to binary. (c) Spheroid pixel area was measured for spheroids with an area greater than 300 pixels excluding objects touching the edge of the image field. Spheroid numbers per field were manually counted and where an object appeared to be two spheroids joined by a connecting tubule, those objects were counted as two spheroids. Three random spheroid fields from different cultures were selected for each exosome concentration (0, 2.5, 5 and 10  $\mu\text{g}/\text{ml}$ ), spheroid number and pixel area counted, and pixel areas normalized to control 0  $\mu\text{g}/\text{ml}$ . Average spheroid size per field for each 2.5, 5 and 10  $\mu\text{g}/\text{ml}$  was compared to control 0  $\mu\text{g}/\text{ml}$  using ANOVA to arrive at normalized spheroid size/field.
